# Supplementary material
Source: PubMed Central journal article supplement (PMC2785490)
Supplement: NIHMS108664-supplement-1_si_002.pdf [file NIHMS108664-supplement-1_si_002.pdf]

# Insight into Environmental Effects on Bonding and Redox Properties of [4Fe-4S] Clusters in Proteins

Shuqiang Niu and Toshiko Ichiye\*

*Department of Chemistry, Georgetown University, Washington, DC 20057-1227*

\*To whom correspondence may be addressed. E-mail: ti9@georgetown.edu

The full citation for ref. 10.

- (10) Straatsma, T. P.; Aprà, E.; Windus, T. L.; Bylaska, E. J.; de Jong, W.; Hirata, S.; Valiev, M.; Hackler, M.; Pollack, L.; Harrison, R.; Dupuis, M.; Smith, D. M. A.; Nieplocha, J.; V., T.; Krishnan, M.; Auer, A. A.; Brown, E.; Cisneros, G.; Fann, G.; Früchtl, H.; Garza, J.; Hirao, K.; Kendall, R.; Nichols, J.; Tsemekhman, K.; Wolinski, K.; Anchell, J.; Bernholdt, D.; Borowski, P.; Clark, T.; Clerc, D.; Dachsel, H.; Deegan, M.; Dyall, K.; Elwood, D.; Glendening, E.; Gutowski, M.; Hess, A.; Jaffe, J.; Johnson, B.; Ju, J.; Kobayashi, R.; Kutteh, R.; Lin, Z.; Littlefield, R.; Long, X.; Meng, B.; Nakajima, T.; Niu, S.-Q.; Rosing, M.; Sandrone, G.; Stave, M.; Taylor, H.; Thomas, G.; van Lenthe, J.; Wong, A.; Zhang, Z. NWChem, A Computational Chemistry Package for Parallel Computers, Version 4.6; Pacific Northwest National Laboratory, Richland, Washington 99352-0999, USA, 2004.

Figure S1. The calculated hydrogen bonding of terminal and bridging ligands of  $[\text{Fe}_4\text{S}_4(\text{SEt})_4]^{2-}$ ,  $[\text{Fe}_4\text{S}_4(\text{SEt})_4]^{2-}\text{-HB(t)}$  and  $[\text{Fe}_4\text{S}_4(\text{SEt})_4]^{2-}\text{-HB(b)}$ .

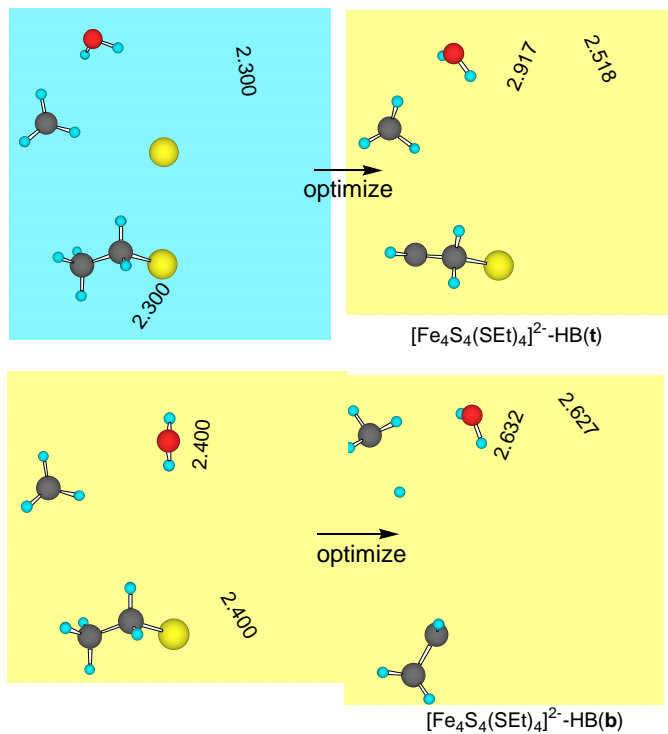

Table S1. The Conformational Parameters of the Ligands of the  $[\text{Fe}_4\text{S}_4(\text{SEt})_4]^{2-}$  Analogs and Protein redox sites.

|                                              | Fe <sub>1</sub> -Fe <sub>2</sub> top-layer |          |          |          | Fe <sub>3</sub> -Fe <sub>4</sub> bottom-layer |          |          |          |
|----------------------------------------------|--------------------------------------------|----------|----------|----------|-----------------------------------------------|----------|----------|----------|
|                                              | Ligand1                                    |          | Ligand2  |          | Ligand3                                       |          | Ligand4  |          |
|                                              | $\chi_2$                                   | $\chi_3$ | $\chi_2$ | $\chi_3$ | $\chi_2$                                      | $\chi_3$ | $\chi_2$ | $\chi_3$ |
| $[\text{Fe}_4\text{S}_4(\text{SEt})_4]^{2-}$ | 87.9                                       | 50.5     | 87.9     | 49.4     | 87.9                                          | 49.4     | 87.9     | 50.5     |
| SL                                           | 173.8                                      | 87.5     | 177.5    | 61.5     | 180.0                                         | 59.4     | 172.0    | 81.3     |
| HB(t)                                        | 66.4                                       | 50.2     | 66.4     | 50.2     | 66.4                                          | 50.2     | 66.4     | 50.2     |
| HB(b)                                        | 141.6                                      | 63.0     | 141.6    | 63.0     | 141.6                                         | 63.0     | 141.6    | 63.0     |
| Fd-like                                      | 88.6                                       | 83.8     | -87.6    | 73.9     | 80.5                                          | -76.0    | -87.8    | 66.3     |
| HiPIP-like                                   | 81.5                                       | -65.5    | -86.4    | 67.7     | -81.0                                         | -153.2   | -178.4   | -171.9   |
| <i>Bt</i> Fd                                 | 83.2                                       | 100.3    | -68.8    | 66.9     | 64.4                                          | -64.2    | -108.8   | 24.0     |
| <i>Tt</i> HiPIP                              | 123.7                                      | -55.9    | -76.3    | 64.8     | -66.5                                         | -148.4   | -170.8   | 174.2    |
